# Supplementary material for: Microfluidic-assisted formulation of cell membrane-camouflaged anisotropic nanostructures
Source: Royal Society of Chemistry journal article supplement (doi:10.1039/d4nr00415a), 2024-01-01
Supplement: d4nr00415a1.pdf [file d4nr00415a1.pdf]

## Supplementary Information

### Microfluidic-assisted formulation of cell membrane-camouflaged anisotropic nanostructures

Kenry<sup>1,2,3,\*</sup>

<sup>1</sup>Department of Pharmacology and Toxicology, R. Ken Coit College of Pharmacy, University of  
Arizona, Tucson, AZ 85721, USA

<sup>2</sup>University of Arizona Cancer Center, University of Arizona, Tucson, AZ 85721, USA

<sup>3</sup>BIO5 Institute, University of Arizona, Tucson, AZ 85721, USA

\*Email: [kenry@arizona.edu](mailto:kenry@arizona.edu)

## Supplementary Figures

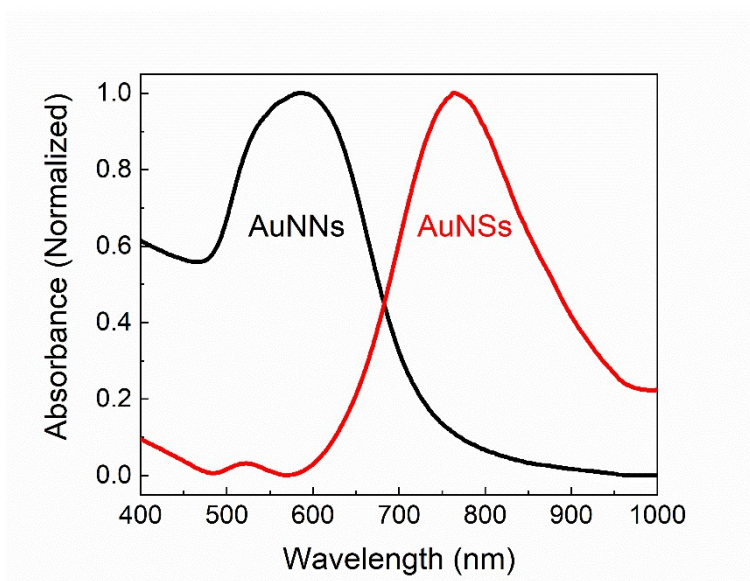

**Figure S1.** Normalized optical absorbance of the anisotropic Au nanostructures (i.e., AuNNs and AuNSs).

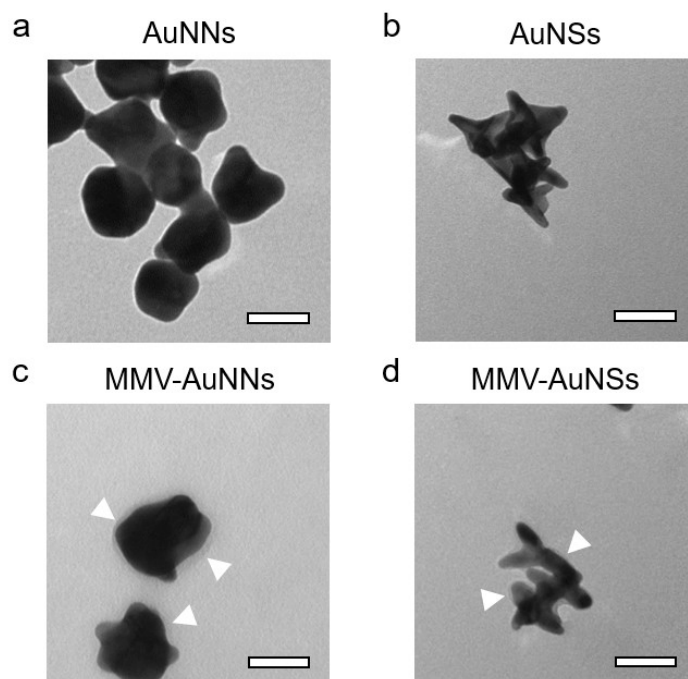

**Figure S2.** Surface morphology of macrophage membrane vesicle-coated Au nanostructures obtained through sequential physical extrusion. TEM images of: (a) AuNNs, (b) AuNSs, (c) MMV-AuNNs, and (d) MMV-AuNSs. White arrows indicate the macrophage membrane coatings. Scale bars represent 40 nm.

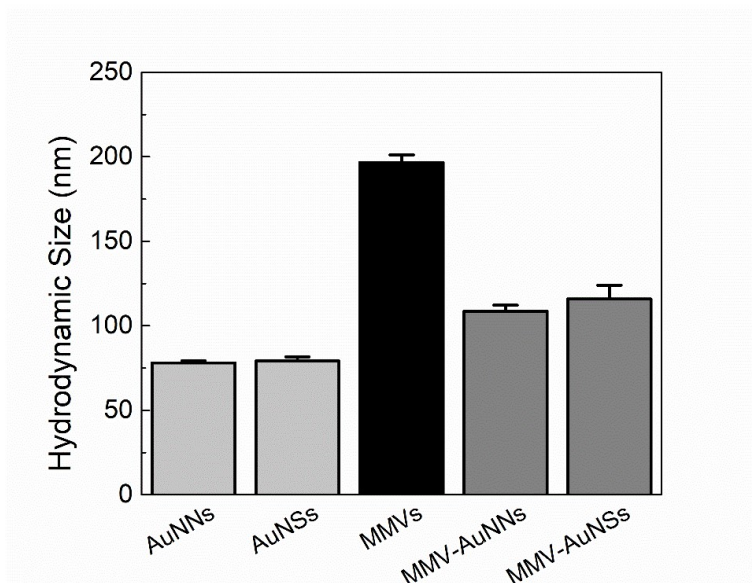

**Figure S3.** Size of different macrophage membrane vesicle-coated Au nanostructures obtained through sequential physical extrusion. Hydrodynamic size of different uncoated and macrophage membrane vesicle-coated Au nanostructures.

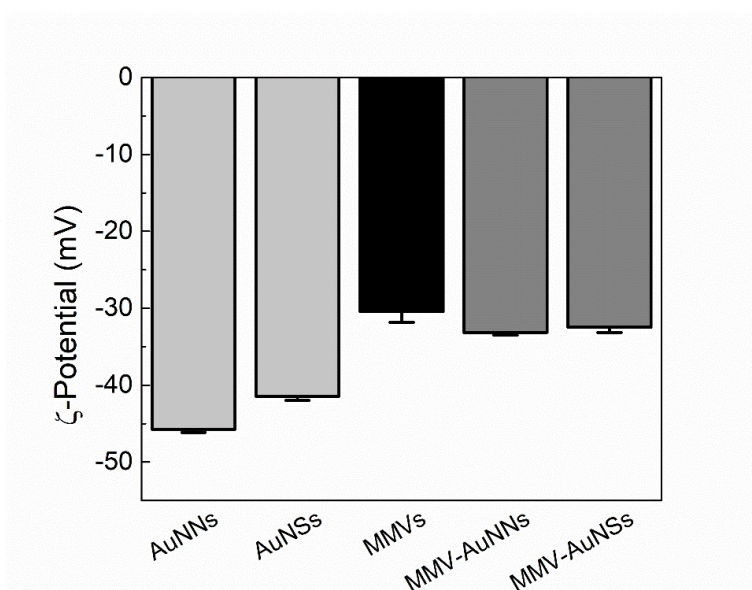

**Figure S4.** Surface charge of different macrophage membrane vesicle-coated Au nanostructures obtained through sequential physical extrusion. Zeta potential of different uncoated and macrophage membrane vesicle-coated Au nanostructures.

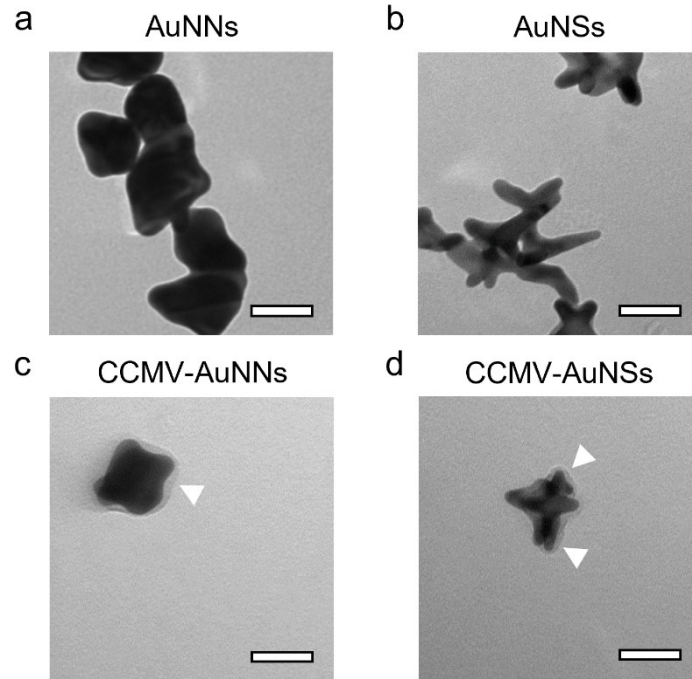

**Figure S5.** Surface morphology of cancer cell membrane vesicle-coated Au nanostructures obtained through microfluidic-mediated physical mixing. TEM images of: (a) AuNNs, (b) AuNSs, (c) CCMV-AuNNs, and (d) CCMV-AuNSs. White arrows indicate the cancer cell membrane coatings. Scale bars represent 40 nm.

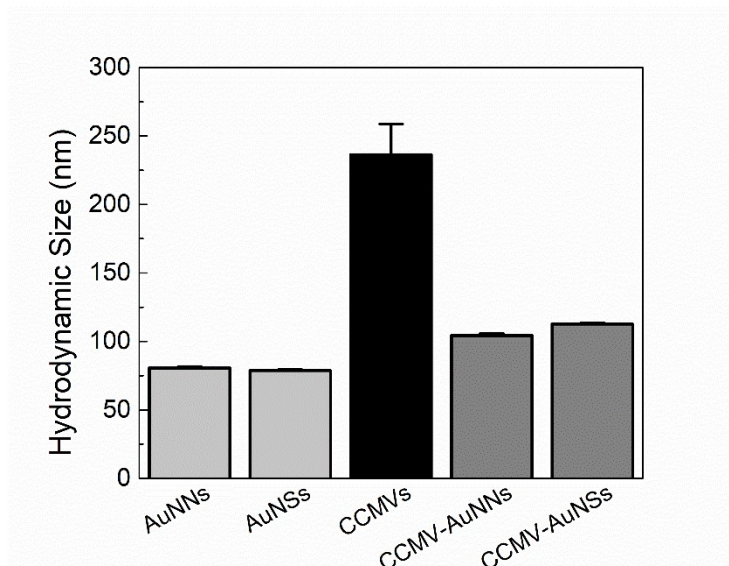

**Figure S6.** Size of different cancer cell membrane vesicle-coated Au nanostructures obtained through microfluidic-mediated physical mixing. Hydrodynamic size of different uncoated and cancer cell membrane vesicle-coated Au nanostructures.

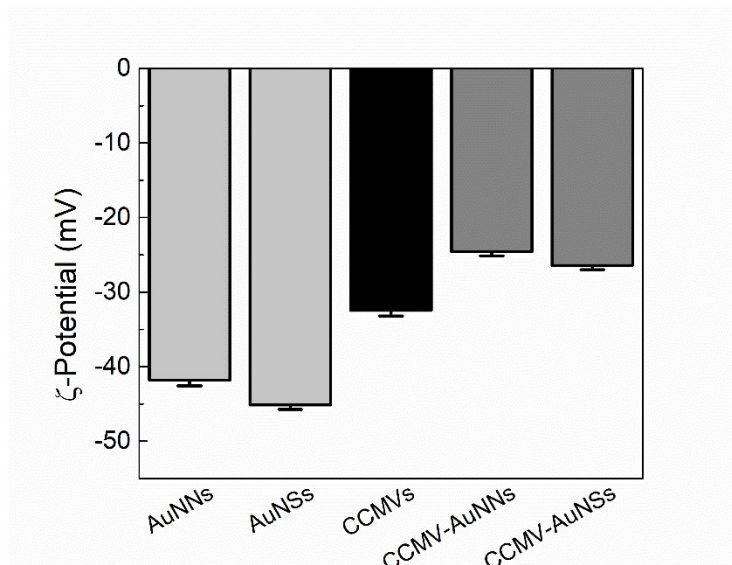

**Figure S7.** Surface charge of different cancer cell membrane vesicle-coated Au nanostructures obtained through microfluidic-mediated physical mixing. Zeta potential of different uncoated and cancer cell membrane vesicle-coated Au nanostructures.

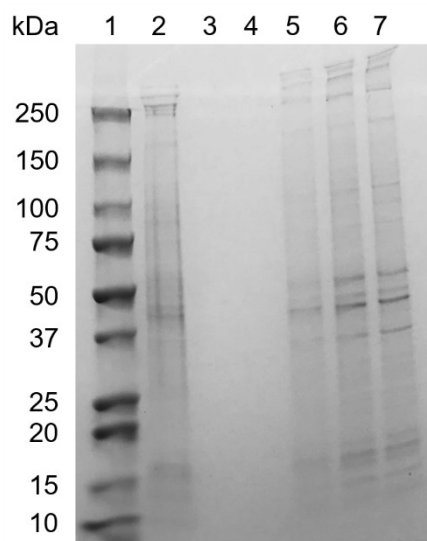

**Figure S8.** Protein expression of the bare and cancer cell membrane vesicle-encapsulated Au nanostructures. Lanes 1 to 7 of the polyacrylamide gel represent protein marker (1), cell lysate (2), AuNNs (3), AuNSs (4), CCMVs (5), CCMV-AuNNs (6), and CCMV-AuNSs (7), respectively.

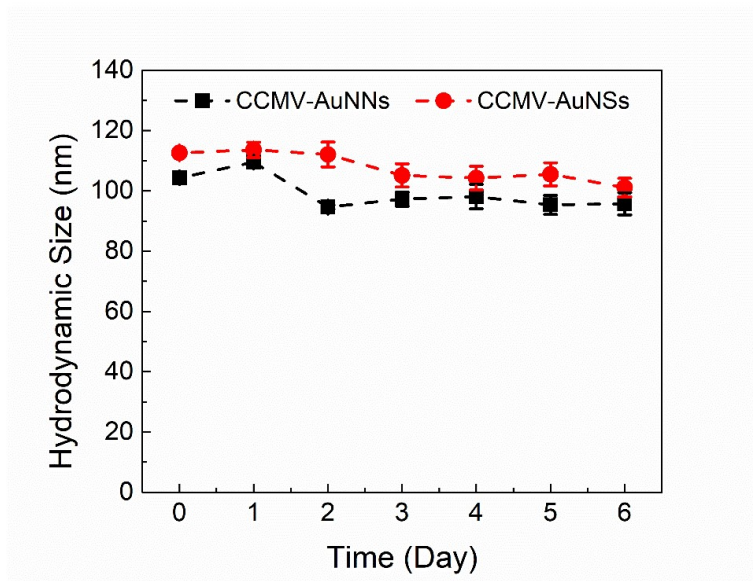

**Figure S9.** Variation of the hydrodynamic size of cancer cell membrane vesicle-encapsulated Au nanostructures over time.

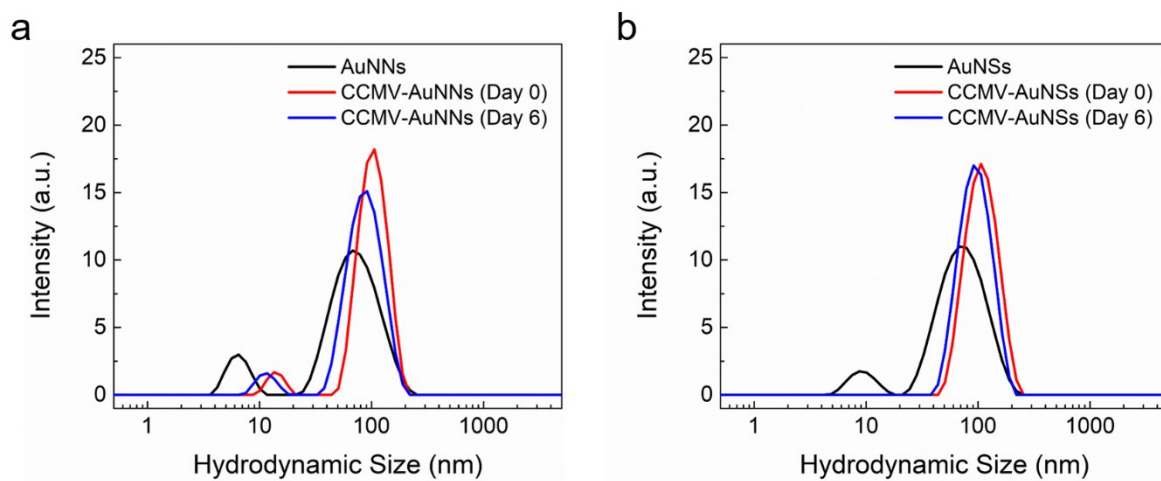

**Figure S10.** Size distribution of the cancer cell membrane vesicle-encapsulated Au nanostructures over time.

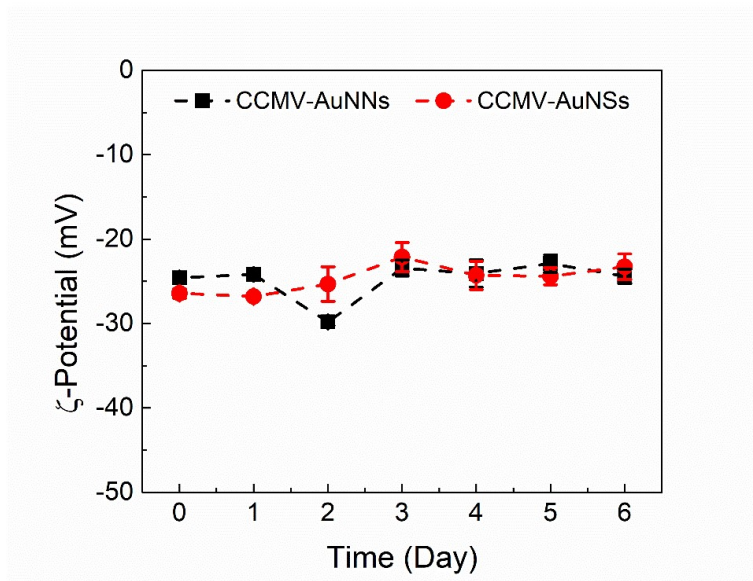

**Figure S11.** Zeta potential variation of the cancer cell membrane vesicle-encapsulated Au nanostructures over time.

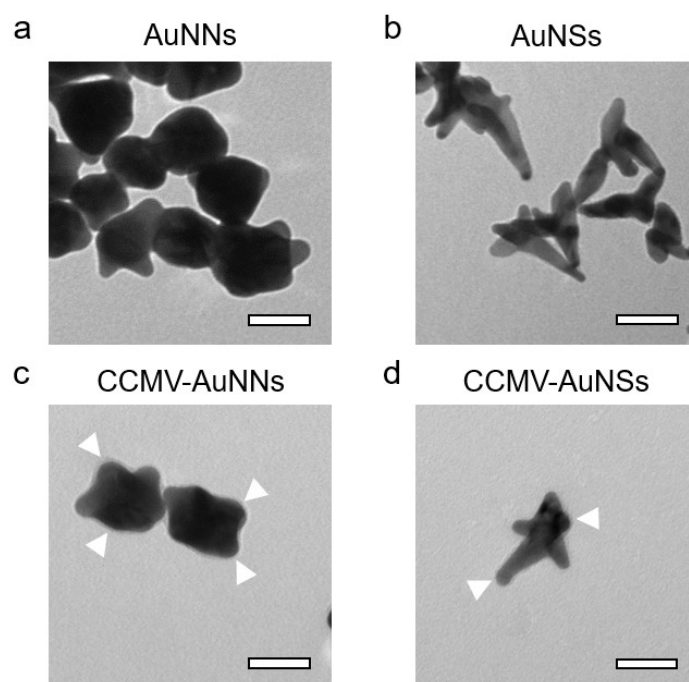

**Figure S12.** Surface morphology of cancer cell membrane vesicle-coated Au nanostructures obtained through sequential physical extrusion. TEM images of: (a) AuNNs, (b) AuNSs, (c) CCMV-AuNNs, and (d) CCMV-AuNSs. White arrows indicate the cancer cell membrane coatings. Scale bars represent 40 nm.

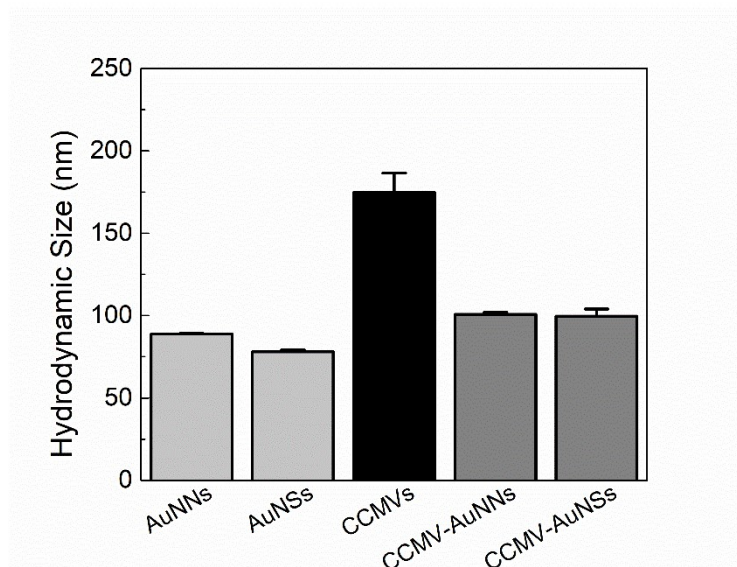

**Figure S13.** Size of different cancer cell membrane vesicle-coated Au nanostructures obtained through sequential physical extrusion. Hydrodynamic size of different uncoated and cancer cell membrane vesicle-coated Au nanostructures.

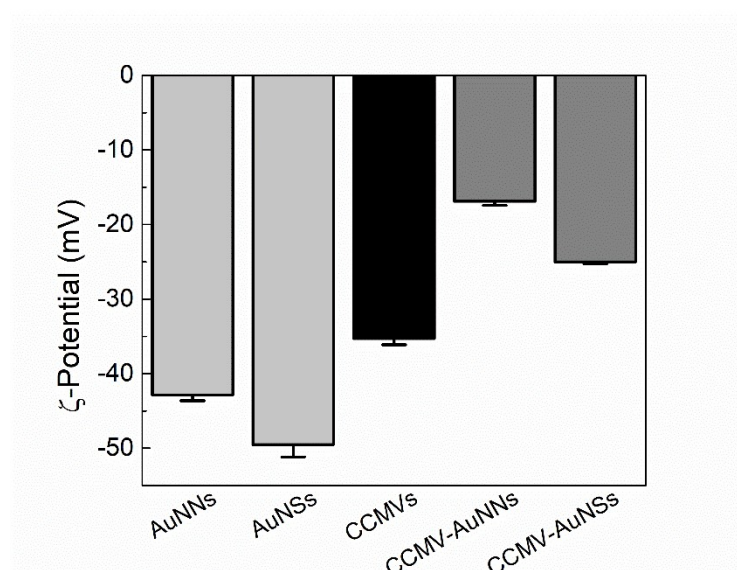

**Figure S14.** Surface charge of different cancer cell membrane vesicle-coated Au nanostructures obtained through sequential physical extrusion. Zeta potential of different uncoated and cancer cell membrane vesicle-coated Au nanostructures.



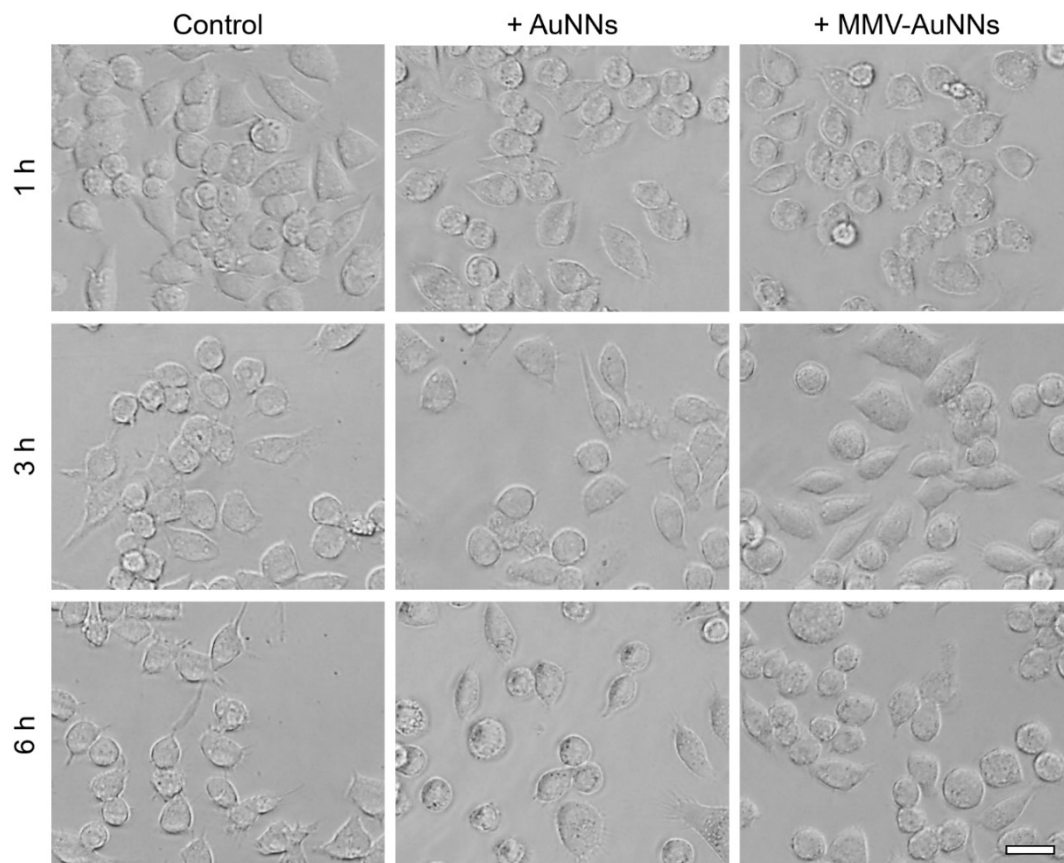

**Figure S15.** Brightfield microscopy images showing the uptake of AuNNs and MMV-AuNNs by RAW 264.7 macrophages over time (i.e., 1, 3, and 6 h). Scale bar represents 20  $\mu\text{m}$ .

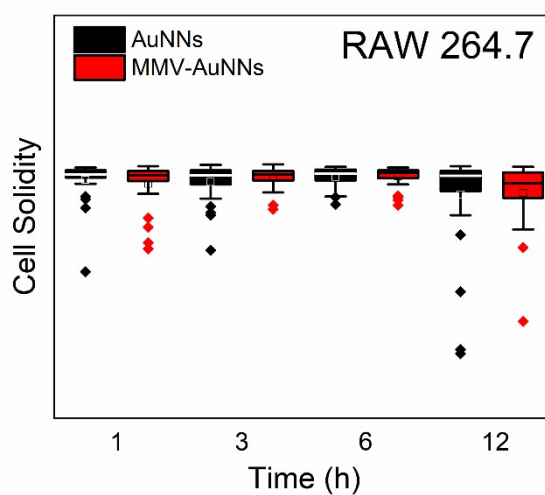

**Figure S16.** Solidity of RAW 264.7 macrophages after different Au nanostructure treatments over time.  $n = 30$  cells.

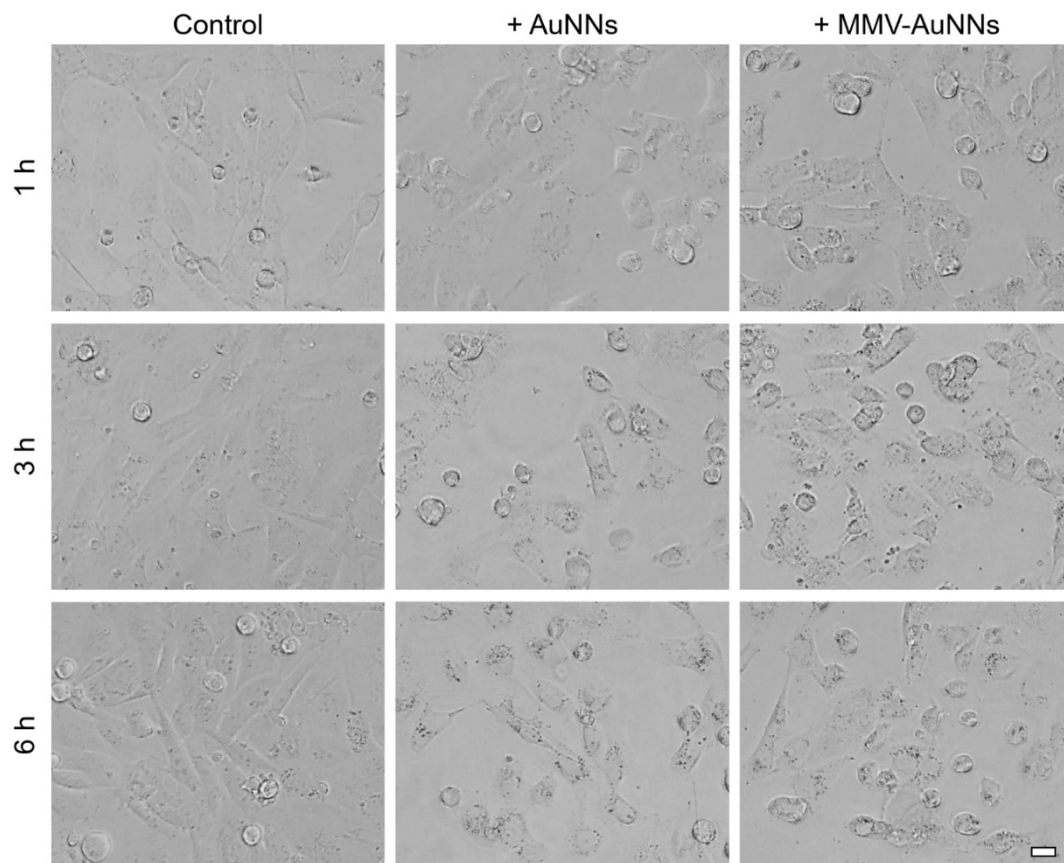

**Figure S17.** Brightfield microscopy images showing the uptake of AuNNs and MMV-AuNNs by MDA-MB-231 breast cancer cells over time (i.e., 1, 3, and 6 h). Scale bar represents 20  $\mu\text{m}$ .

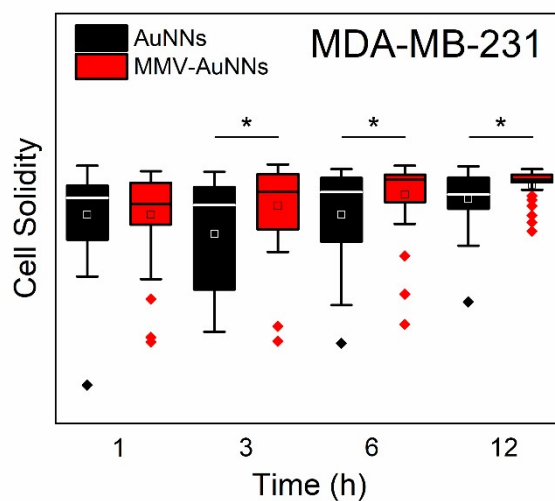

**Figure S18.** Solidity of MDA-MB-231 breast cancer cells after different Au nanostructure treatments over time.  $n = 30$  cells. \*  $p < 0.05$  based on the non-parametric Mann-Whitney test.
